# Supplementary material for: Bright neodymium complexes for efficient near infra-red organic light emitting diodes
Source: Royal Society of Chemistry journal article supplement (doi:10.1039/d0nj00403k), 2020-01-01
Supplement: d0nj00403k1.pdf [file d0nj00403k1.pdf]

## Supporting Information

### **Bright Neodymium Complexes for Efficient Near Infra-Red Organic Light Emitting Diodes**

Zubair Ahmed,<sup>\*a,d</sup> Harold C. Avila,<sup>a,e</sup> Rafael Santos,<sup>a</sup> Jiang Kai,<sup>b</sup> J.A.L.C. Resende,<sup>c</sup> Elisa Bandini,<sup>d</sup> Andrea Barbieri,<sup>\*d</sup> Marco Cremona<sup>\*a</sup>

<sup>a</sup> Department of Physics, Pontifícia Universidade Católica do Rio de Janeiro, PUC-Rio, Rio de Janeiro, RJ 22453-970, Brazil.

<sup>b</sup> Department of Chemistry, Pontifícia Universidade Católica do Rio de Janeiro, PUC-Rio, Rio de Janeiro, RJ 22453-970, Brazil.

<sup>c</sup> Instituto de Ciências Exatas e da Terra, Centro Universitário do Araguaia, Universidade Federal do Mato Grosso, 78600-000, Barra do Garças - MT, Brasil.

<sup>d</sup> Istituto per la Sintesi Organica e la Fotoreattività (ISOF), Consiglio Nazionale delle Ricerche (CNR), Bologna 40129, Italy.

<sup>e</sup> Physics Program, Universidad del Atlántico, Puerto Colombia, Atlántico, Colombia

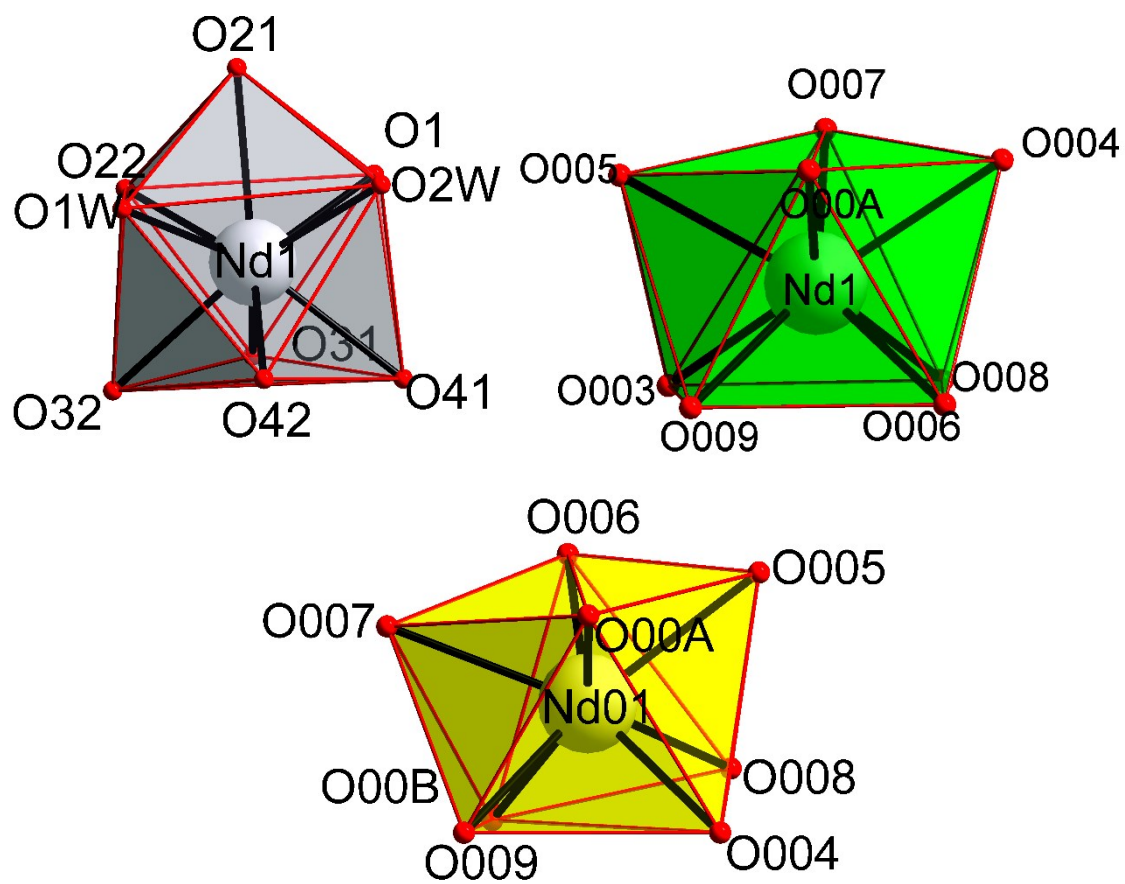

Figure S1. Coordination polyhedra of the complexes 1-3.

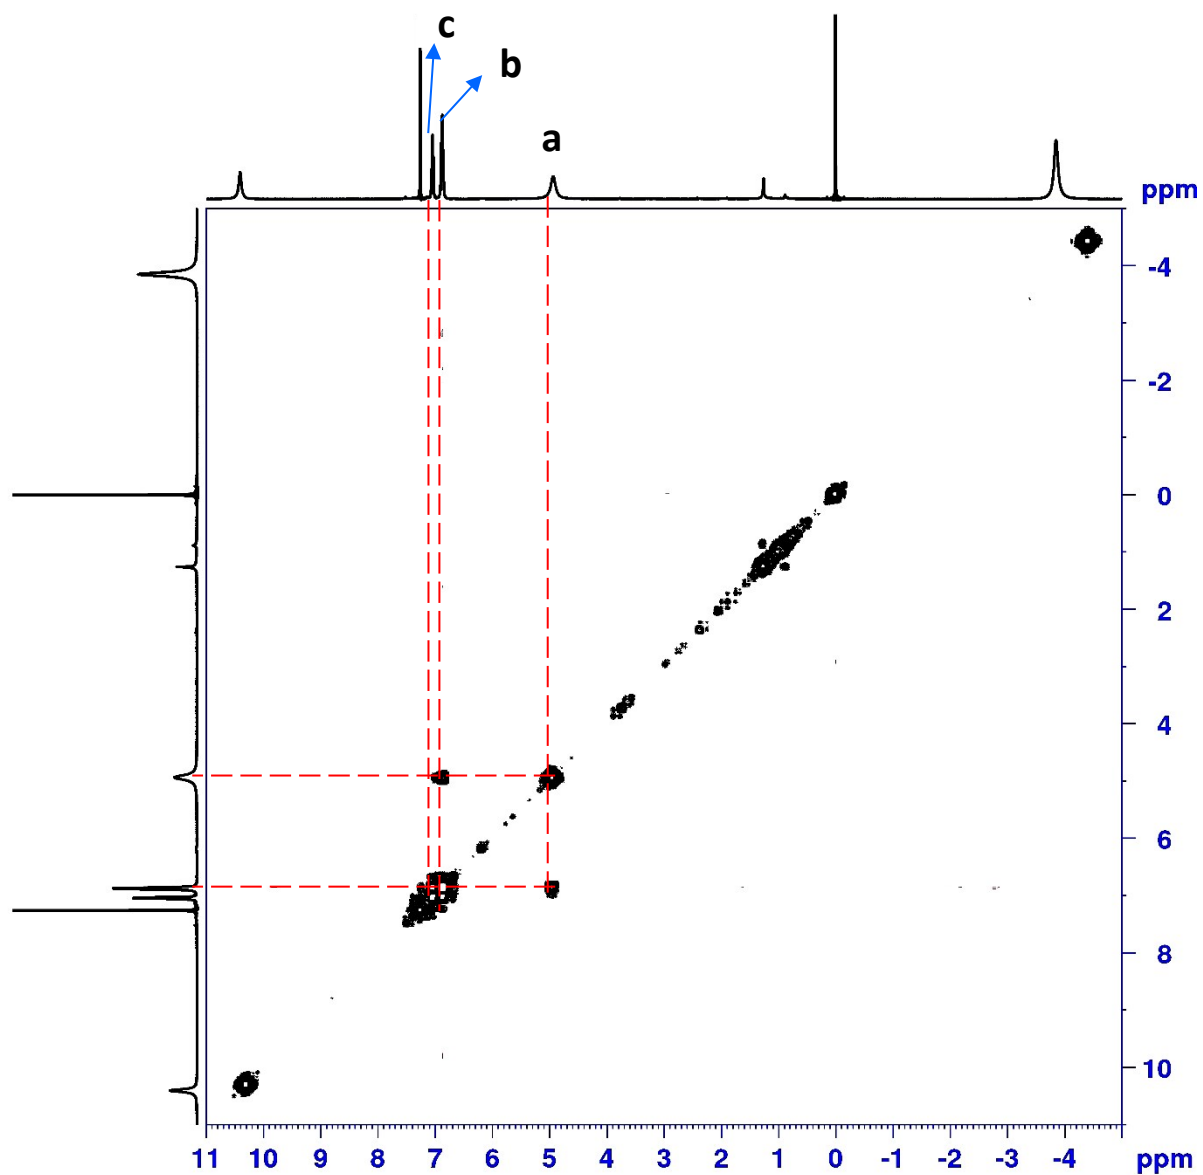

Figure S2. COSY spectrum of the complex 1.

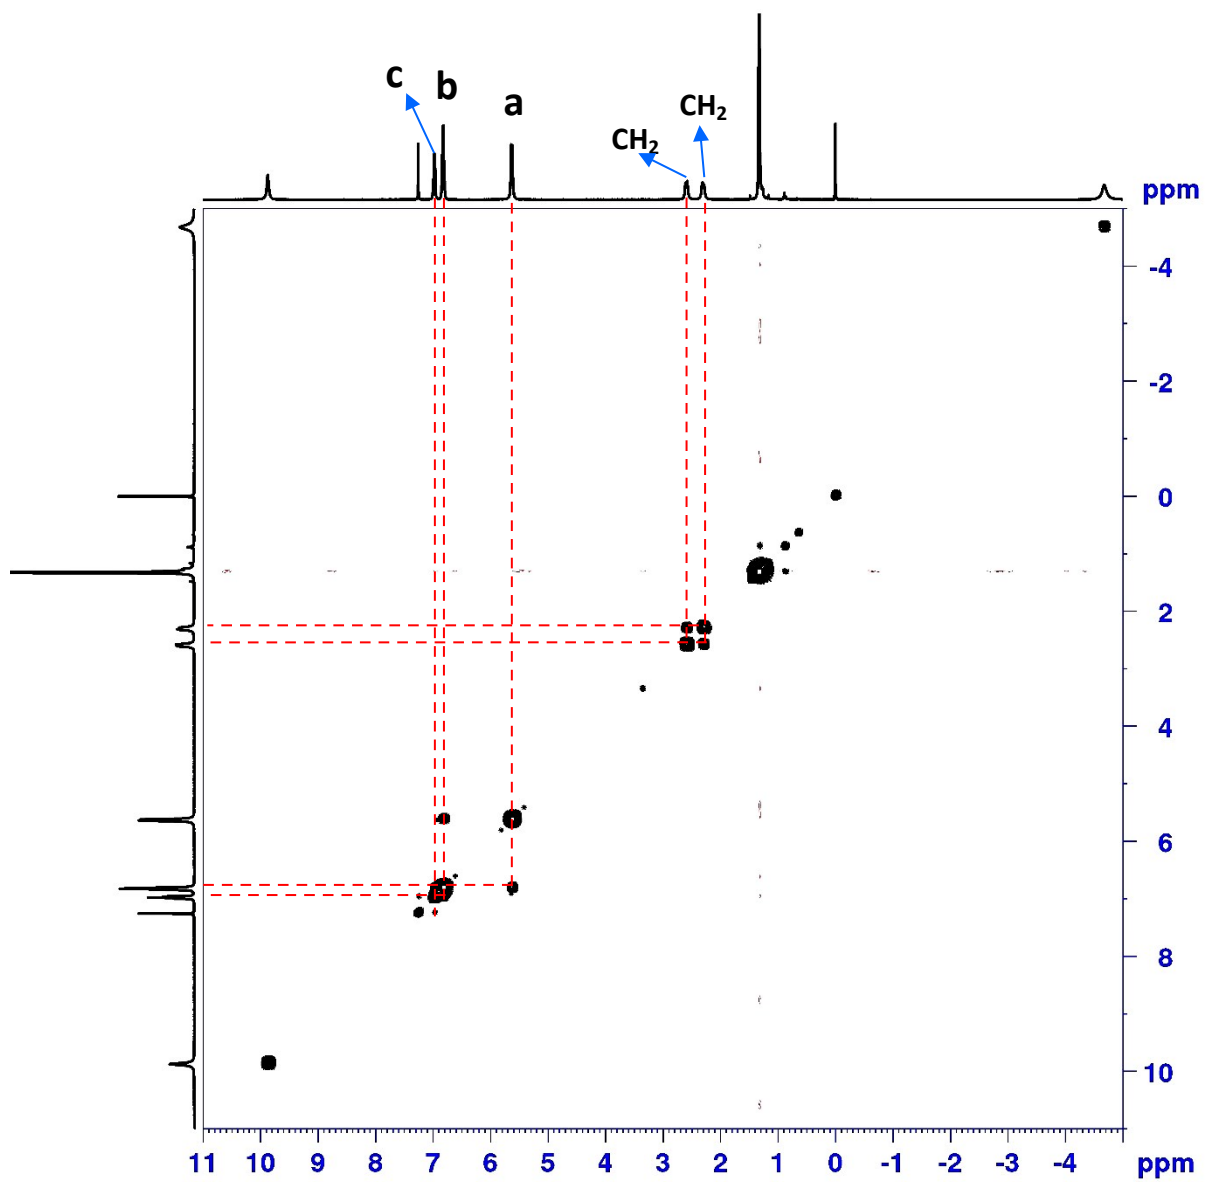

Figure S3. COSY spectrum of the complex 2.

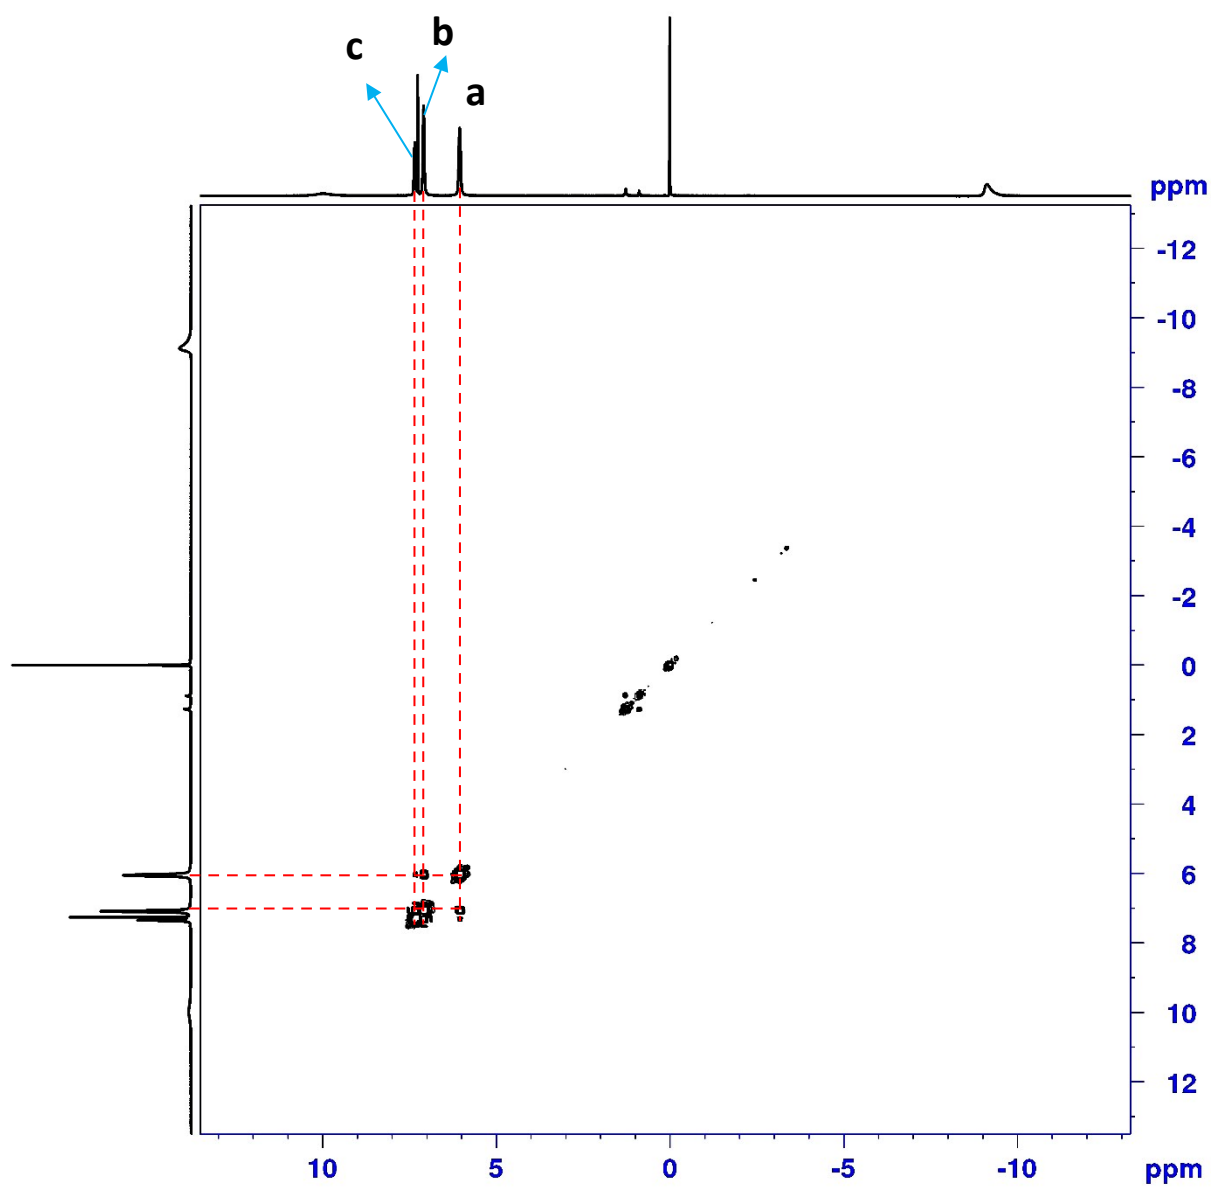

Figure S4. COSY spectrum of the complex 3.

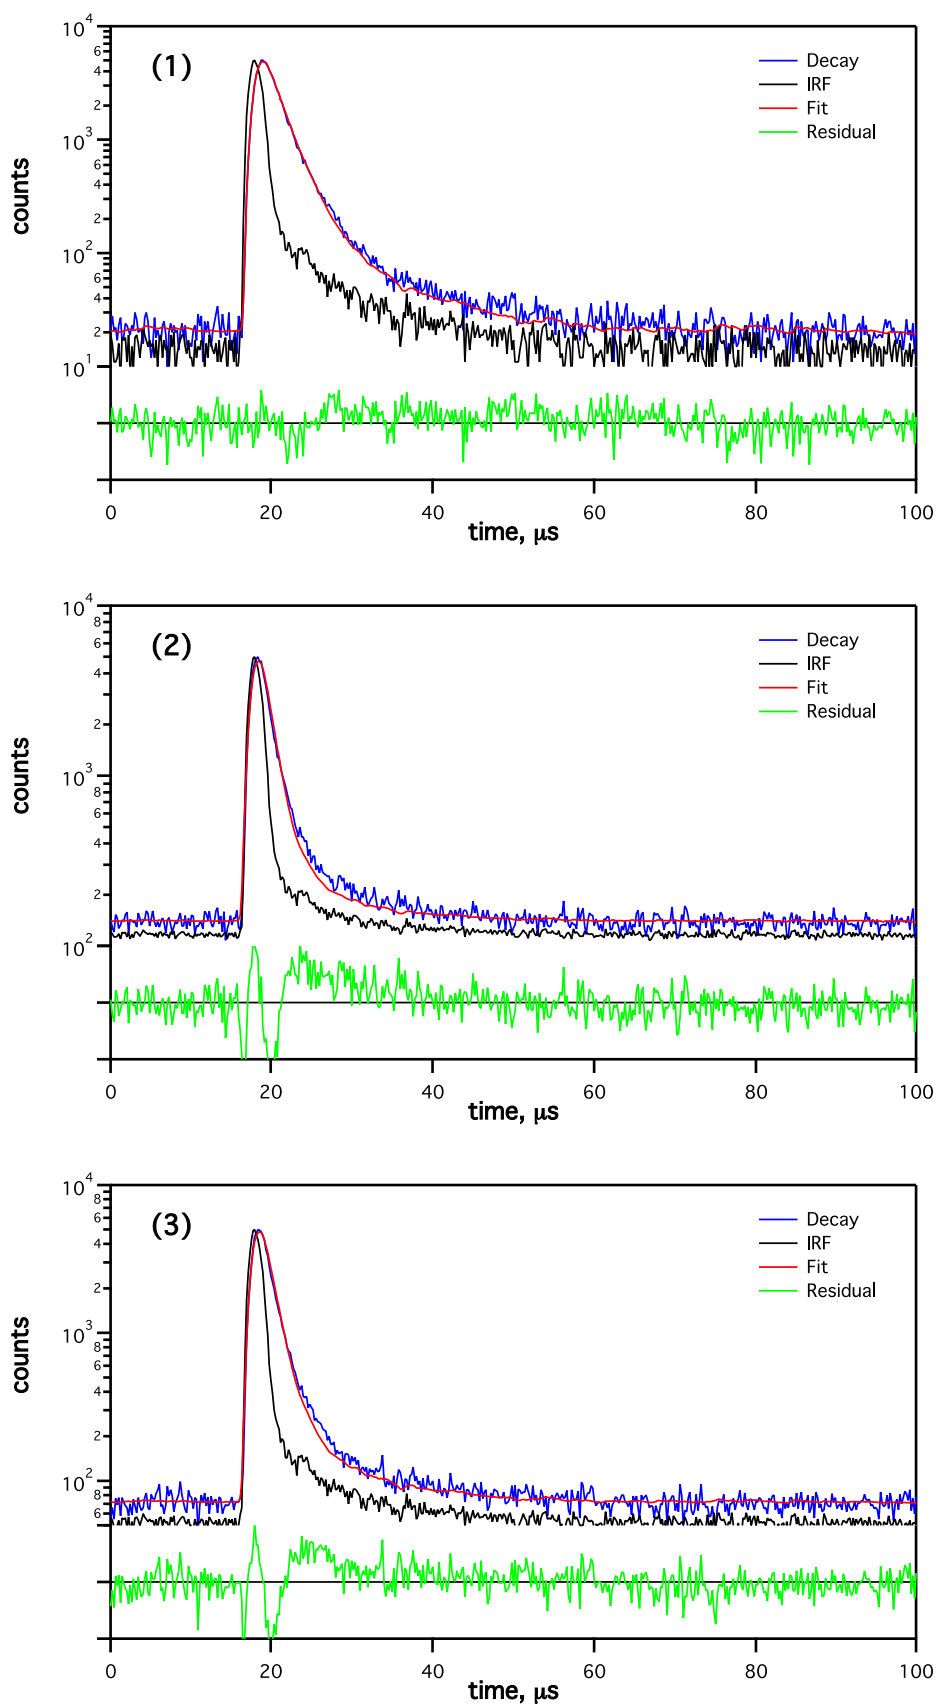

Figure S5. Emission decays for complex 1-3 in  $\text{CH}_2\text{Cl}_2$ ,  $\lambda_{\text{ex}} = 305 \text{ nm}$ .

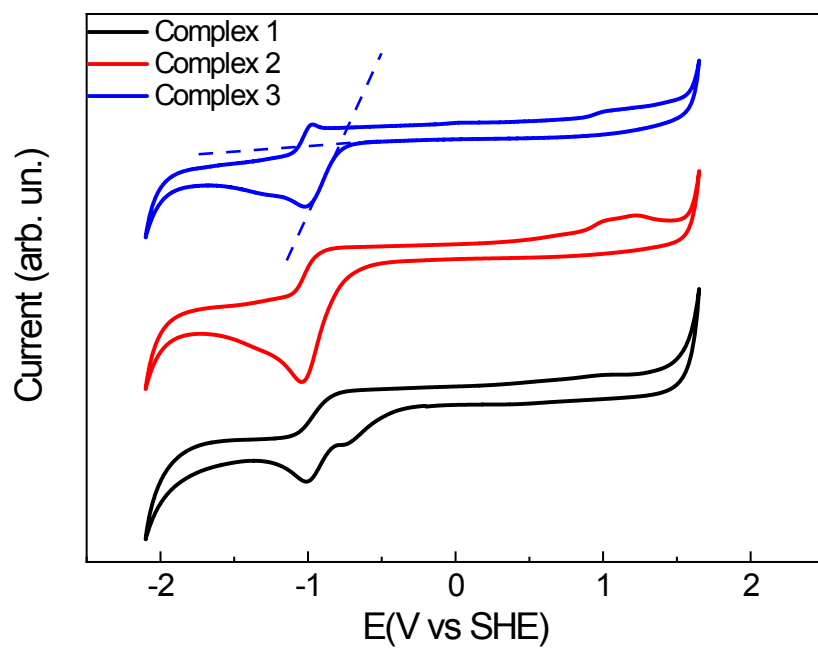

**Figure S6.** Cyclic Voltammetry curves of the complexes, **1-3**.

**Table S1.** Bond lengths (Å) of the complexes **1-3**.

|          | <b>1</b> | <b>2</b> | <b>3</b>   |
|----------|----------|----------|------------|
| NdO1–O1  | 2.443(2) | 2.373(3) | 2.3634(17) |
| NdO1–O2  | 2.425(2) | 2.428(3) | 2.3670(17) |
| NdO1–O3  | 2.539(2) | 2.395(3) | 2.449(2)   |
| NdO1–O4  | 2.470(2) | 2.471(3) | 2.4715(19) |
| NdO1–O5  | 2.454(2) | 2.443(3) | 2.428(2)   |
| NdO1–O6  | 2.462(2) | 2.447(3) | 2.4574(19) |
| NdO1–O7  | 2.495(2) | 2.398(3) | 2.4621(18) |
| NdO1–O8  |          |          | 2.4503(19) |
| NdO1–O1W | 2.515(3) | 2.525(3) |            |
| NdO1–O2W | 2.503(3) |          |            |

**Table S2.**  $\delta$  (deg) and  $\varphi$  (deg) values of the complexes **1-3**

|             | <b>1</b>                    |      | <b>2</b>                   |      | <b>3</b>                   |      |
|-------------|-----------------------------|------|----------------------------|------|----------------------------|------|
| $\delta_1$  | O2W–[O1W–O1]–O2             | 2.6  | O3–[O2–O4]–O1              | 0.2  | O8–[O1–O3]–O4              | 8.96 |
| $\delta_2$  | O7–[O5–O6]–O4               | 12.4 | O5–[O7–O1W]–O4             | 9.98 | O7–[O2–O5]–O6              | 16.8 |
| $\delta_3$  | O1W–[O5–O2]–O4              | 49.3 | O3–[O5–O4]–O1W             | 59.4 | O6–[O1–O5]–O8              | 49.3 |
| $\delta_4$  | O2W–[O6–O1]–O4              | 54.1 | O7–[O2–O6]–O1              | 57.3 | O2–[O3–O7]–O8              | 56.2 |
| $\delta_5$  | O2–[O3–O1W]–O2W             | 60.6 | –                          | –    | –                          | –    |
| $\varphi_1$ | O1W–[O4–2W]–O6              | 30.0 | O4–[O6–O7]–O3              | 29.9 | O1–[O7–O4]–O2              | 28.3 |
| $\varphi_2$ | O1–[O7–O5]–O2               | 32.4 | O1W–[O1–O2]–O5             | 31.0 | O3–[O6–O5]–O8              | 24.7 |
| S           | distorted MSAP ( $C_{4v}$ ) |      | distorted SAP ( $D_{4d}$ ) |      | distorted SAP ( $D_{4d}$ ) |      |

**Table S3.**  $\delta$  (deg) and  $\varphi$  (deg) values of ideal polyhedrons

|             | SAP  | TP   | DD   | MSAP | TTP  |
|-------------|------|------|------|------|------|
| $\delta_1$  | 0.0  | 0.0  | 29.5 | 0.0  | 26.4 |
| $\delta_2$  | 0.0  | 21.8 | 29.5 | 69.1 | 59.6 |
| $\delta_3$  | 52.4 | 48.2 | 29.5 | 53.0 | 59.6 |
| $\delta_4$  | 52.4 | 48.2 | 29.5 | 53.0 | 47.6 |
| $\delta_5$  | –    | –    | –    | 59.0 | 59.6 |
| $\varphi_1$ | 24.5 | 14.1 | 0.0  | 37.6 | 26.6 |
| $\varphi_2$ | 24.5 | 14.1 | 0.0  | 37.6 | 47.6 |
